# Supplementary material
Source: PubMed Central journal article supplement (PMC9238938)
Supplement: ijvr-23-69-s001.pdf [file ijvr-23-69-s001.pdf]

# Supporting Online Material for

## Genetic characterization and clinical characteristics of bovine viral diarrhoea viruses in cattle herds of Heilongjiang province, China

**Zhou, Y.; Ren, Y.; Dai, G.; Li, X.; Xiang, Y.; Zhang, J.; Jiang, Y.; Jiang, S.; Hou, X.; Zhu, Z.\*\* and Wu, R.\***

\*To whom correspondence should be addressed: E-mail: fuhewu@126.com

\*\*To whom co-correspondence should be addressed: E-mail: zhanbozhu@163.com

Published Winter 2022, Iranian Journal of Veterinary Research, 23(1): 69-73  
DOI: 10.22099/IJVR.2021.38650.5625

**This PDF file includes:**  
Supplementary Table (ST1)

### Supplementary Table

**ST1: Information on BVDV isolates and reference strains from GenBank in this study**

| No.                             | Cattle farm | Districts  | Breeds      | Origins        | Isolate | Clinical sample | Clinical sign | Sub genotype | Age  | Collection year | 5'-UTR GenBank accession |
|---------------------------------|-------------|------------|-------------|----------------|---------|-----------------|---------------|--------------|------|-----------------|--------------------------|
| BVDV-1 isolates from this study |             |            |             |                |         |                 |               |              |      |                 |                          |
| 1                               | HJ          | Heihe      | Dairy cow   | HLJ            | HJ-1    | Liver           | GD            | 1b           | 13 m | 2010            | JX065783                 |
| 2                               | HJ          | Heihe      | Dairy cow   | HLJ            | HJ-2    | Liver           | GD            | 1b           | 13 m | 2010            | JX065784                 |
| 3                               | DZ          | Suihua     | Beef cattle | Liaoning       | DZ-1    | Intestine       | GD            | 1b           | 10 m | 2016            | KY865360                 |
| 4                               | DZ          | Suihua     | Beef cattle | Liaoning       | DZ-2    | Intestine       | GD            | 1b           | 10 m | 2016            | KY865359                 |
| 5                               | WD          | Harbin     | Dairy cow   | Australia      | WD-1    | Blood           | GD            | 1b           | 8 m  | 2016            | KY865361                 |
| 6                               | WD          | Harbin     | Dairy cow   | Australia      | WD-2    | Blood           | GD            | 1b           | 8 m  | 2016            | KY865362                 |
| 7                               | WD          | Harbin     | Dairy cow   | Australia      | WD-3    | Blood           | GD            | 1b           | 7 m  | 2016            | KY865363                 |
| 8                               | XH          | Daqing     | Dairy cow   | HLJ            | DQ1     | Liver           | GD            | 1b           | 8 m  | 2017            | MT179828                 |
| 9                               | XH          | Daqing     | Dairy cow   | HLJ            | DQ2     | Liver           | GD            | 1b           | 8 m  | 2017            | MT179829                 |
| 10                              | XH          | Daqing     | Dairy cow   | HLJ            | DQ3     | Liver           | GD            | 1b           | 8 m  | 2017            | MT179830                 |
| 11                              | XH          | Daqing     | Dairy cow   | HLJ            | DQ4     | Liver           | GD            | 1b           | 8 m  | 2017            | MT179831                 |
| 12                              | XH          | Daqing     | Dairy cow   | HLJ            | XH-1    | Feces           | GD            | 1o           | 8 m  | 2016            | KY865374                 |
| 13                              | XH          | Daqing     | Dairy cow   | HLJ            | XH-2    | Feces           | GD            | 1o           | 8 m  | 2016            | KY865375                 |
| 14                              | XH          | Daqing     | Dairy cow   | HLJ            | XH-3    | Feces           | GD            | 1o           | 6 m  | 2016            | KY865378                 |
| 15                              | XH          | Daqing     | Dairy cow   | HLJ            | XH-4    | Feces           | GD            | 1o           | 6 m  | 2016            | KY865376                 |
| 16                              | XH          | Daqing     | Dairy cow   | HLJ            | XH-5    | Serum           | SD            | 1o           | 6 m  | 2016            | KY865377                 |
| 17                              | XH          | Daqing     | Dairy cow   | HLJ            | XH-6    | Serum           | SD            | 1o           | 7 m  | 2016            | KY865379                 |
| 18                              | MF          | Mudanjiang | Dairy cow   | HLJ, Australia | MF-1    | Serum           | SD            | 1c           | 5 m  | 2016            | KY865369                 |
| 19                              | MF          | Mudanjiang | Dairy cow   | HLJ, Australia | MF-2    | Serum           | SD            | 1c           | 3 m  | 2016            | KY865370                 |
| 20                              | MF          | Mudanjiang | Dairy cow   | HLJ, Australia | MF-3    | Serum           | SD            | 1o           | 7 m  | 2016            | KY865371                 |
| 21                              | MF          | Mudanjiang | Dairy cow   | HLJ, Australia | MF-4    | Serum           | SD            | 1b           | 4 m  | 2016            | KY865372                 |
| 22                              | MF          | Mudanjiang | Dairy cow   | HLJ, Australia | MF-5    | Serum           | SD            | 1c           | 4 m  | 2016            | KY865373                 |
| 23                              | HY          | Mudanjiang | Dairy cow   | Uruguay        | HY-1    | Serum           | SD            | 1c           | 18 m | 2016            | KY865364                 |
| 24                              | HY          | Mudanjiang | Dairy cow   | Uruguay        | HY-2    | Serum           | SD            | 1c           | 18 m | 2016            | KY865365                 |
| 25                              | HY          | Mudanjiang | Dairy cow   | Uruguay        | HY-3    | Serum           | SD            | 1o           | 18 m | 2016            | KY865366                 |
| 26                              | HY          | Mudanjiang | Dairy cow   | Uruguay        | HY-4    | Serum           | SD            | 1m           | 18 m | 2016            | KY865367                 |
| 27                              | HY          | Mudanjiang | Dairy cow   | Uruguay        | HY-5    | Serum           | SD            | 1m           | 18 m | 2016            | KY865368                 |
| 28                              | FH          | Qiqihar    | Dairy cow   | Australia      | FH-1    | Serum           | SD            | 1c           | 3 m  | 2016            | KY865356                 |
| 29                              | FH          | Qiqihar    | Dairy cow   | Australia      | FH-2    | Serum           | SD            | 1c           | 4 m  | 2016            | KY865357                 |
| 30                              | FH          | Qiqihar    | Dairy cow   | Australia      | FH-3    | Serum           | SD            | 1c           | 3 m  | 2016            | KY865358                 |
| 31                              | DZ          | Suihua     | Beef cattle | HLJ            | ZD1     | Serum           | SD            | 1b           | 10 m | 2017            | MT179841                 |
| 32                              | DZ          | Suihua     | Beef cattle | HLJ            | ZD2     | Serum           | SD            | 1b           | 10 m | 2017            | MT179842                 |
| 33                              | DZ          | Suihua     | Beef cattle | HLJ            | ZD3     | Serum           | SD            | 1b           | 10 m | 2017            | MT179843                 |

|    |      |            |             |             |       |           |    |    |      |      |          |
|----|------|------------|-------------|-------------|-------|-----------|----|----|------|------|----------|
| 34 | DZ   | Suihua     | Beef cattle | HLJ         | ZD4   | Serum     | SD | 1b | 10 m | 2017 | MT179844 |
| 35 | DZ   | Suihua     | Beef cattle | HLJ         | ZD5   | Serum     | SD | 1d | 10 m | 2017 | MT179845 |
| 36 | QG   | Mudanjiang | Dairy cow   | Australia   | QG    | Serum     | SD | 1b | 50 m | 2018 | MT179838 |
| 37 | HY   | Mudanjiang | Dairy cow   | Uruguay     | HY    | Serum     | SD | 1d | 18 m | 2017 | MT179834 |
| 38 | YL   | Harbin     | Dairy cow   | HLJ         | YL-1  | Nose swab | RD | 1o | 30 m | 2016 | KY865380 |
| 39 | LD   | Daqing     | Dairy cow   | HLJ         | LD    | Lungs     | RD | 1d | 2 m  | 2017 | MT179836 |
| 40 | SET  | Daqing     | Beef cattle | Jilig       | SET   | Lungs     | RD | 1d | 2 m  | 2017 | MT179840 |
| 41 | HLR  | Heihe      | Beef cattle | IM          | HLR1  | Lungs     | RD | 1d | 7 m  | 2016 | MT179832 |
| 42 | HLR  | Heihe      | Beef cattle | IM          | HLR2  | Lungs     | RD | 1b | 7 m  | 2017 | MT179833 |
| 43 | SW   | Heihe      | Dairy cow   | Australia   | AQ1   | Lungs     | RD | 1d | 3 m  | 2017 | MT179823 |
| 44 | SW   | Heihe      | Dairy cow   | Australia   | AQ2   | Lungs     | RD | 1d | 2 m  | 2017 | MT179824 |
| 45 | SW   | Heihe      | Dairy cow   | Australia   | AQ3   | Lungs     | RD | 1d | 2 m  | 2016 | MT179825 |
| 46 | CJSH | Qiqihar    | Dairy cow   | Australia   | CJSH  | Lungs     | RD | 1b | 2 m  | 2018 | MT179827 |
| 47 | QW   | Qiqihar    | Dairy cow   | Australia   | QQHE  | Lungs     | RD | 1b | 3 m  | 2018 | MT179839 |
| 48 | BA   | Heihe      | Dairy cow   | New Zealand | BA    | Lungs     | RD | 1d | 6 m  | 2018 | MT179826 |
| 49 | MS   | Jixi       | Beef cattle | HLJ         | MS    | Lungs     | RD | 1b | 7 m  | 2018 | MT179837 |
| 50 | ZY   | Daqing     | Dairy cow   | HLJ         | ZY    | Lungs     | RD | 1b | 10 m | 2017 | MT179846 |
| 51 | SP   | Jixi       | Beef cattle | Jilig       | AD1   | Lungs     | RD | 1b | 5 m  | 2018 | MT179821 |
| 52 | SP   | Jixi       | Beef cattle | Jilig       | AD2   | Lungs     | RD | 1b | 5 m  | 2018 | MT179822 |
| 53 | TN   | Harbin     | Beef cattle | Jilig       | JL-TN | Lungs     | RD | 1b | 7 m  | 2018 | MT179835 |

BVDV reference strains retrieved from GenBank

|    |  |              |             |                |  |    |  |      |  |          |
|----|--|--------------|-------------|----------------|--|----|--|------|--|----------|
| 1  |  | Cattle       | USA         | NADL           |  | 1a |  | 1963 |  | NC001461 |
| 2  |  | Cattle       | Hungary     | VEDEVAC        |  | 1b |  | 2003 |  | AJ585412 |
| 3  |  | Cattle       | Poland      | 187-AN         |  | 1b |  | 2017 |  | MK381363 |
| 4  |  | Bos taurus   | UK          | MRI0842        |  | 1b |  | 2017 |  | LT901267 |
| 5  |  | Calf         | South Korea | 43923          |  | 1b |  | 2009 |  | GQ985459 |
| 6  |  | Cattle       | USA         | MS15.1         |  | 1b |  | 2009 |  | GU395536 |
| 7  |  | Cattle       | China       | shihezi148     |  | 1c |  | 2006 |  | EU159700 |
| 8  |  | Cow          | Australia   | Bega           |  | 1c |  | 1998 |  | AF049221 |
| 9  |  | Cattle       | Australia   | AQMZ02AI21-2   |  | 1c |  | 2002 |  | AB300687 |
| 10 |  | Cattle       | Austria     | F              |  | 1d |  | 1998 |  | AF298065 |
| 11 |  | Cattle       | Germany     | Lamspringe-735 |  | 1d |  | 2000 |  | AJ304391 |
| 12 |  | Cattle       | Germany     | 16484/93       |  | 1d |  | 2000 |  | AJ304383 |
| 13 |  | Cattle       | Slovakia    | 3186V6         |  | 1e |  | 2000 |  | AF298062 |
| 14 |  | Cattle       | Austria     | J              |  | 1f |  | 1998 |  | AF298067 |
| 15 |  | Cattle       | Australia   | AQMZ02AI21-2   |  | 1g |  | 1998 |  | AF298064 |
| 16 |  | Cattle       | Italy       | S9609A         |  | 1h |  | 1996 |  | Z79764   |
| 17 |  | Cattle       | UK          | 23-15          |  | 1i |  | 1997 |  | F298059  |
| 18 |  | Cattle       | Switzerland | Rebe           |  | 1k |  | 2000 |  | AH010041 |
| 19 |  | Pig          | China       | ZM-95          |  | 1m |  | 1995 |  | AF526381 |
| 20 |  | Bos taurus   | China       | SD-15          |  | 1m |  | 2015 |  | KR866116 |
| 21 |  | Yak          | China       | XZ-92          |  | 1m |  | 2010 |  | KJ578915 |
| 22 |  | Cattle       | Japan       | Shitara0206    |  | 1n |  | 2006 |  | AB359930 |
| 23 |  | Pig          | China       | JS10116        |  | 1o |  | 2010 |  | JN248734 |
| 24 |  | Cattle       | Japan       | IS25CP/01      |  | 1o |  | 2001 |  | AB359931 |
| 25 |  | Cattle       | China       | BJ0702         |  | 1p |  | 2007 |  | GU120248 |
| 26 |  | Cattle       | China       | 11N36          |  | 1q |  | 2011 |  | JX437156 |
| 27 |  | Cattle       | Italy       | UM/136/08      |  | 1s |  |      |  | LM994673 |
| 28 |  | Cattle       | Italy       | SI/207/12      |  | 1t |  | 2014 |  | LM994674 |
| 29 |  | Yak          | China       | M31182         |  | 1u |  | 2010 |  | JQ799141 |
| 30 |  | Dairy cattle | China       | GXBH-EB34      |  | 1u |  | 2011 |  | KJ578831 |
| 31 |  | Cattle       | USA         | 890            |  | 2  |  | 1994 |  | U18059   |
| 32 |  | Cattle       | Japan       | KZ-91-CP       |  | 2  |  | 1997 |  | AB003619 |
| 33 |  | Cow          | Australia   | Australia-3    |  | 3  |  | 2010 |  | HQ403056 |
| 34 |  | Bos taurus   | Italy       | Italy-280/11-A |  | 3  |  | 2011 |  | JN703311 |

HLJ: Heilongjiang province, IM: Inner Mongolia, SD: Without clinical symptoms including subclinical, persistent, and acute infection, GD: Manifesting gastrointestinal symptoms including diarrhea or mucosal disease, and RD: Manifesting respiratory disease
